# Supplementary material for: Multi-omics architecture of childhood obesity and metabolic dysfunction uncovers biological pathways and prenatal determinants
Source: PubMed Central journal article supplement — Nat Commun. 2025 Jan 14;16:654. doi: 10.1038/s41467-025-56013-7 (PMC11732992; doi:10.1038/s41467-025-56013-7), 2025-01-14
Supplement: 41467_2025_56013_MOESM2_ESM.pdf [file 41467_2025_56013_MOESM2_ESM.pdf]

## **Description of Additional Supplementary Files**

File Name: Supplementary Data 1

Description: Available omics data in HELIX, list of serum metabolites measured in HELIX, list of plasma proteins measured in HELIX

File Name: Supplementary Data 2

Description: List of CpG sites included in the present study, list of miRNAs included in the present study, list of transcript clusters included in the present study, list of metabolites included in the present study

File Name: Supplementary Data 3

Description: SHAP values of the top features contributing to Cluster C, SHAP values of the top features contributing to Cluster B

File Name: Supplementary Data 4

Description: Single-omics analysis on the association of Cluster C with the top identified features, single-omics analysis on the association of Cluster B with the top identified features
